# Supplementary material for: Fluorescence properties of 2-aminopurine in human telomeric DNAElectronic supplementary information (ESI) available: CD spectra of Ap modified and unmodified human telomeric quadruplex. See http://www.rsc.org/suppdata/cc/b4/b403913k/
Source: Royal Society of Chemistry journal article supplement (doi:10.1039/b403913k), 2004-01-01
Supplement: b403913k.pdf [file b403913k.pdf]

Electronic supplementary information

**Fluorescence Properties of 2-Aminopurine in Human Telomeric DNA**

**Takumi Kimura, Kiyohiko Kawai, Mamoru Fujitsuka and Tetsuro Majima\***

*Institute of Scientific and Industrial Research, Osaka University*

8-1 Mihogaoka, Ibaraki, Osaka 567-0047, Japan.

**CD spectra of Ap modified and unmodified human telomeric quadruplexes**

The circular dichroism (CD) spectra were recorded using a Jasco J-700 spectrophotometer. The CD measurements were performed using a fluorescence cell with a 10-mm path length.

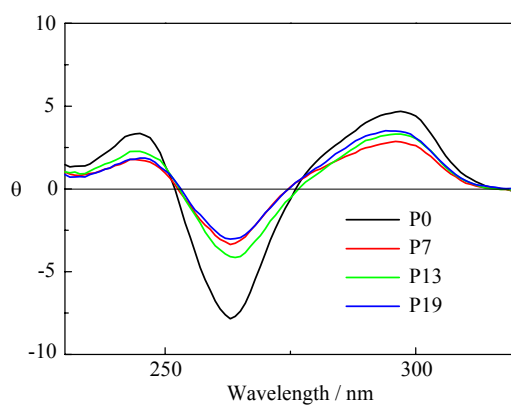

Figure 1. CD spectra of the P0, 7, 13 and 19 quadruplexes at 8 °C. Sample solutions contained 100 mM ODN (base conc.), 50 mM sodium-phosphate buffer (pH7.0), and 100 mM sodium chloride.
